# Supplementary material
Source: bioRxiv or medRxiv preprint supplement (https://www.biorxiv.org/highwire/filestream/96987/field_highwire_adjunct_files/0/217976-1.pdf)
Supplement: Supplementary file [file 217976-1.pdf]

## **Supplemental Information**

### **Circuit models of low dimensional shared variability in cortical networks**

Chengcheng Huang, Douglas A. Ruff, Ryan Pyle, Robert Rosenbaum,  
Marlene R. Cohen and Brent Doiron

#### **This PDF file includes:**

Supplemental Figures S1-S4

Table S1

Supplementary Methods

Captions for Movies S1-S4

#### **Other Supplementary Materials for this manuscript includes the following:**

Movies S1-S4

# Supplemental Figures

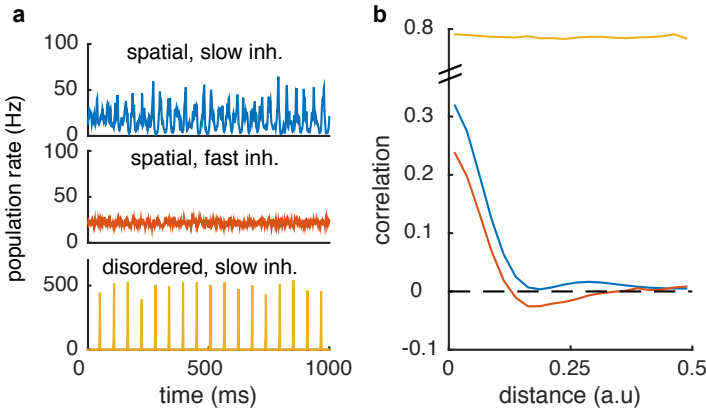

Supplemental Figure S1: **a**, Examples of mean population rates from a spatially ordered model with slow inhibition (blue) (Fig. 2b, green), a spatially ordered model with fast inhibition (red) (Fig. 2b, purple), and a disordered model with slow inhibition (Fig. 2a, green). **b**, Pair-wise correlation as a function of distance between neuron pairs for the three models.

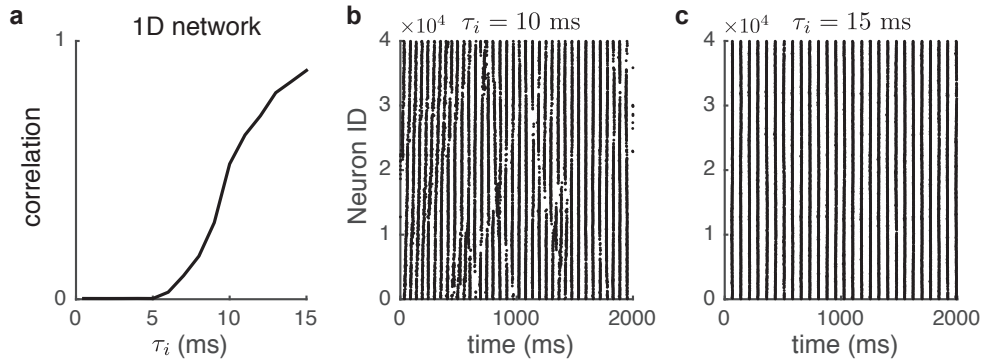

Supplemental Figure S2: **a**, One-dimensional spatial model shows a rapid increase in mean pairwise correlation with increasing time scale of inhibitory synaptic current (compare with Fig. 2e). **b**, Example rasters of network activity when  $\tau_i = 10$  ms. **c**, Same as **b** with  $\tau_i = 15$  ms. Parameters of the one dimensional model are the same as those in the two-dimensional spatial model in Fig. 2b, except that neurons are ordered on interval  $[0, 1]$ .

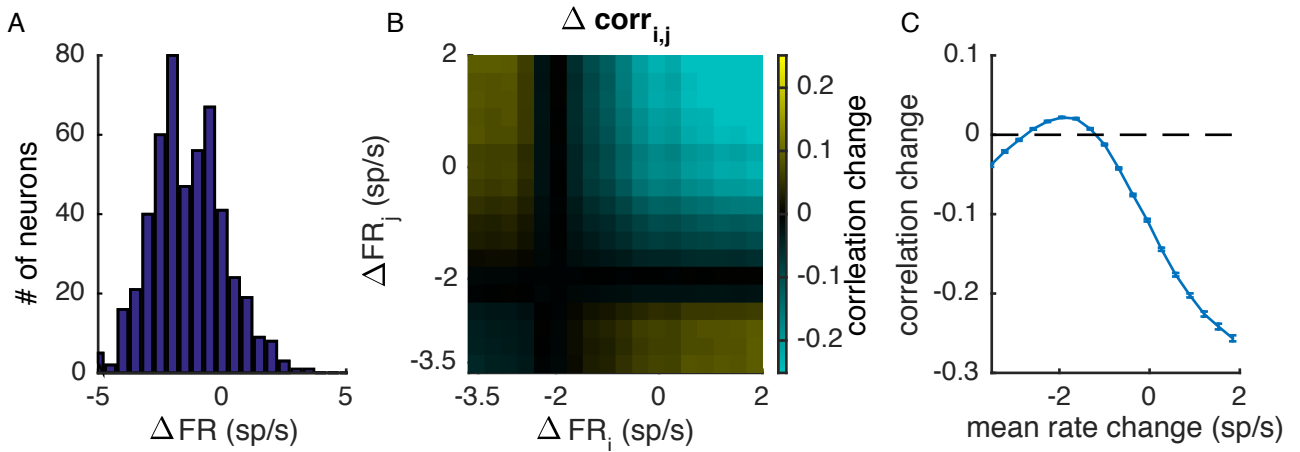

Supplemental Figure S3: Relationship between correlation change and firing rate change of the pair by attention. (A) Histogram of firing rate change by attention. (B) Correlation change of neuron pair  $i$  and  $j$  as a function for firing rate change of neuron  $i$  ( $x$ -axis) and firing rate change of neuron  $j$  ( $y$ -axis). (C) Correlation change as a function of the mean firing rate change of the pair. Parameters of the network are the same as Fig. 3 with  $\mu_I = 0.2$  pA for unattended state and  $\mu_I = 0.35$  pA for attended state. A total of 500 excitatory neurons are sampled from MT layer and there is a total of 2025 spike counts per neuron to compute the correlation for each attentional state.  $\Delta$ =Attended-Unattended.

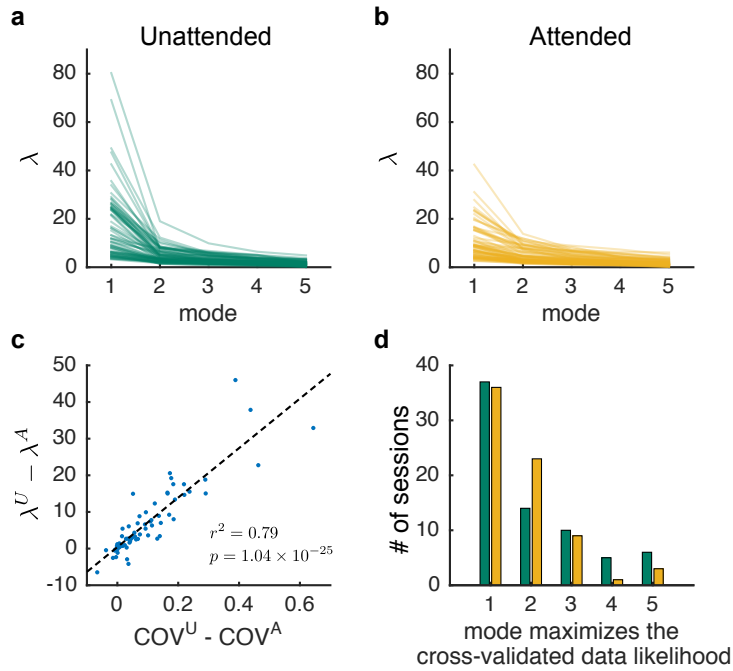

Supplemental Figure S4: Factor analysis of the multi-electrode recordings from V4<sup>1</sup>. **a**, The first five largest eigenvalues of the shared component of the spike count covariance matrix. Each line is for data from each recording session (72 in total, trial number and unit number of each session see Table S1). **b**, Same as **a** for the attended state. **c**, The difference between the largest eigenvalues and the difference between the mean covariances from the unattended and attended states are correlated. **d**, Histogram of the modes that maximize the cross-validated data likelihood across sessions. More details see Experimental methods and Statistical methods.

| Session # | Unit # | Trial # (Att.) | Trial # (Unatt.) | Session # | Unit # | Trial # (Att.) | Trial # (Unatt.) |
|-----------|--------|----------------|------------------|-----------|--------|----------------|------------------|
| 1         | 50     | 702            | 361              | 37        | 21     | 364            | 744              |
| 2         | 80     | 361            | 702              | 38        | 38     | 744            | 364              |
| 3         | 27     | 408            | 349              | 39        | 22     | 306            | 338              |
| 4         | 49     | 349            | 408              | 40        | 44     | 338            | 306              |
| 5         | 26     | 795            | 1038             | 41        | 46     | 516            | 480              |
| 6         | 35     | 1038           | 795              | 42        | 62     | 480            | 516              |
| 7         | 56     | 280            | 624              | 43        | 43     | 620            | 509              |
| 8         | 73     | 624            | 280              | 44        | 55     | 509            | 620              |
| 9         | 26     | 1109           | 992              | 45        | 43     | 601            | 543              |
| 10        | 47     | 992            | 1109             | 46        | 52     | 543            | 601              |
| 11        | 30     | 673            | 824              | 47        | 40     | 484            | 658              |
| 12        | 47     | 824            | 673              | 48        | 62     | 658            | 484              |
| 13        | 33     | 597            | 622              | 49        | 37     | 452            | 320              |
| 14        | 79     | 622            | 597              | 50        | 63     | 320            | 452              |
| 15        | 24     | 242            | 619              | 51        | 37     | 548            | 657              |
| 16        | 51     | 619            | 242              | 52        | 65     | 657            | 548              |
| 17        | 14     | 261            | 583              | 53        | 39     | 369            | 282              |
| 18        | 39     | 583            | 261              | 54        | 57     | 282            | 369              |
| 19        | 26     | 399            | 666              | 55        | 41     | 413            | 501              |
| 20        | 46     | 666            | 399              | 56        | 53     | 501            | 413              |
| 21        | 25     | 696            | 800              | 57        | 35     | 601            | 486              |
| 22        | 46     | 800            | 696              | 58        | 49     | 486            | 601              |
| 23        | 30     | 751            | 861              | 59        | 36     | 392            | 414              |
| 24        | 56     | 861            | 751              | 60        | 61     | 414            | 392              |
| 25        | 25     | 670            | 724              | 61        | 35     | 483            | 421              |
| 26        | 50     | 724            | 670              | 62        | 50     | 421            | 483              |
| 27        | 28     | 470            | 414              | 63        | 32     | 592            | 433              |
| 28        | 52     | 414            | 470              | 64        | 55     | 433            | 592              |
| 29        | 25     | 1728           | 1843             | 65        | 35     | 692            | 439              |
| 30        | 50     | 1843           | 1728             | 66        | 53     | 439            | 692              |
| 31        | 32     | 515            | 643              | 67        | 36     | 655            | 437              |
| 32        | 67     | 643            | 515              | 68        | 49     | 437            | 655              |
| 33        | 16     | 412            | 566              | 69        | 36     | 390            | 352              |
| 34        | 42     | 566            | 412              | 70        | 47     | 352            | 390              |
| 35        | 19     | 752            | 730              | 71        | 32     | 507            | 385              |
| 36        | 42     | 730            | 752              | 72        | 71     | 385            | 507              |

Table S1: Units number and trial number of each recording session for the Factor analysis of the multi-electrode recordings from V4<sup>1</sup> (Fig. 4a, Fig. S4).

## Supplementary Methods

### Hidden variable model

First, we consider the attentional effect on noise correlations in one cortical area. Let  $R$  be the response variable of the neurons in that area and  $H$  be the external

source of variability which projects to  $R$  with strength  $\beta$ ;  $R = X + \beta H$ . Here we take the variance of  $H$ ,  $\text{Var}^\alpha(H)$ , to be dependent on the attentional state  $\alpha \in \{U, A\}$ , and for now  $X$  is an attention independent source of fluctuating input. Denote  $P_H = \frac{\beta^2 \text{Var}^U(H)}{\text{Var}^U(R)} = \frac{\beta^2 \text{Var}^U(H)}{\text{Var}(X) + \beta^2 \text{Var}^U(H)}$  as the influence of  $H$  on  $R$  ( $0 < P_H < 1$ ). Then the constraint on  $H$  is:

$$\frac{\Delta_{U-A} \text{Var}(H)}{\text{Var}^U(H)} = \frac{1}{P_H} \frac{\Delta_{U-A} \text{Var}(R)}{\text{Var}^U(R)}. \quad (1)$$

Here  $\Delta_{U-A} \text{Var}(H) = \text{Var}^U(H) - \text{Var}^A(H)$  (same for  $\Delta_{U-A} \text{Var}(R)$ ). The population data provide values for  $\Delta_{U-A} \text{Var}(R)/\text{Var}^U(R)$ . In Fig. 1c (main text) the change in  $\text{Var}(H)$ ,  $\Delta_{U-A} \text{Var}(H)/\text{Var}^U(H)$ , is plotted as a function of the influence of  $H$  on  $R$ ,  $P_H$ , with the V4 data (Fig. 1b) determining  $\Delta_{U-A} \text{Var}(R)/\text{Var}^U(R) = 0.3$ .

Next, we consider the correlation between two cortical areas. Let  $R$  be the neural response from MT and  $X$  be the neural response from V1. Suppose all the variability in  $R$  is from  $X$  and the transfer function of  $X$  to  $R$  can be linearly approximated as  $\delta R = \alpha \delta X$ , then

$$\begin{aligned} \text{Var}(R) &= \alpha^2 \text{Var}(X), \\ \text{cov}(R, X) &= \alpha \text{Var}(X). \end{aligned}$$

which gives

$$\text{Var}(R) = \text{cov}(R, X)^2 / \text{Var}(X). \quad (2)$$

Hence any decrease in  $\text{Var}(R)$  by attention predicts a decrease in  $\text{cov}(R, X)$ , which is in contradiction with the electrophysiological recordings<sup>2</sup> (Fig. 1b,d).

Assume a hidden source of variability,  $H$ , that projects to both  $R$  and  $X$  with strengths  $\beta$  and  $\kappa$ , respectively. Specifically,  $R = \alpha X + \beta H$  and  $X = X_0 + \kappa H$ , where  $\text{cov}(X_0, H) = 0$ . Suppose  $\text{Var}(X) = 1$  and  $\beta$  and  $\kappa$  are attention independent, then

$$\begin{aligned} \text{Var}(R) &= \alpha^2 + (\beta^2 + 2\beta\kappa\alpha) \text{Var}(H), \\ \text{cov}(R, X) &= \alpha + \beta\kappa \text{Var}(H). \end{aligned}$$

In order to have an attention-mediated simultaneous reduction in  $\text{Var}(R)$  and an increase in  $\text{cov}(R, X)$  we need  $\alpha$  increases and  $\text{Var}(H)$  decreases with attention. The relative change in  $\text{cov}(R, X)$  by attention is

$$\frac{\frac{\Delta}{A-U} \text{cov}(R, X)}{\text{cov}^U(E, X)} = \frac{\frac{\Delta}{A-U} \alpha - \beta \kappa \frac{\Delta}{U-A} \text{Var}(H)}{\alpha_U + \beta \kappa \text{Var}^U(H)}. \quad (3)$$

An attention-mediated increase of the correlation between V1 and MT implies  $\frac{\Delta}{A-U} \text{cov}(R, X) > 0$ , which gives

$$\frac{\Delta}{A-U} \alpha > \beta \kappa \frac{\Delta}{U-A} \text{Var}(H). \quad (4)$$

The reduction in  $\text{Var}(R)$  by attention is

$$\begin{aligned} \frac{\Delta}{U-A} \text{Var}(R) &= -(\alpha_A^2 - \alpha_U^2) + \beta^2 \frac{\Delta}{U-A} \text{Var}(H) + 2\beta\kappa (\alpha_U \text{Var}^U(H) - \alpha_A \text{Var}^A(H)) \\ &= -\left(2\alpha_U + \frac{\Delta}{A-U} \alpha\right) \frac{\Delta}{A-U} \alpha + \beta^2 \frac{\Delta}{U-A} \text{Var}(H) + 2\beta\kappa \alpha_U \frac{\Delta}{U-A} \text{Var}(H) - 2\beta\kappa \text{Var}^A(H) \\ &= \beta^2 \frac{\Delta}{U-A} \text{Var}(H) - 2\alpha_U \frac{\Delta}{A-U} \text{cov}(R, X) - \left(\frac{\Delta}{A-U} \alpha\right)^2 - 2\beta\kappa \text{Var}^A(H) \frac{\Delta}{A-U} \alpha \end{aligned}$$

Hence the relative reduction in  $\text{Var}(R)$  is

$$\frac{\frac{\Delta}{U-A} \text{Var}(R)}{\text{Var}^U(R)} = \frac{\frac{\Delta}{U-A} \text{Var}(H)}{\text{Var}^U(H)} P_H - 2\alpha_U \frac{\frac{\Delta}{A-U} \text{cov}(R, X)}{\text{cov}^U(R, X)} \frac{\text{cov}^U(R, X)}{\text{Var}^U(R)} - \frac{\left(\frac{\Delta}{A-U} \alpha\right)^2 + 2\beta\kappa \text{Var}^A(H)}{\text{Var}^U(R)}. \quad (5)$$

The second term from the RHS of Eq. (5) is

$$\begin{aligned} 2\alpha_U \frac{\text{cov}^U(R, X)}{\text{Var}^U(R)} \frac{\frac{\Delta}{A-U} \text{cov}(E, X)}{\text{cov}^U(E, X)} &= \frac{2\alpha_U^2 + 2\beta\kappa \alpha_U \text{Var}^U(H)}{\alpha_U^2 + (\beta^2 + 2\beta\kappa \alpha_U) \text{Var}^U(H)} \frac{\frac{\Delta}{A-U} \text{cov}(R, X)}{\text{cov}^U(R, X)} \\ &> (1 - P_H) \frac{\frac{\Delta}{A-U} \text{cov}(R, X)}{\text{cov}^U(R, X)} \end{aligned}$$

With inequality (4), the third term from the RHS of Eq. (5) is

$$\begin{aligned}
\frac{\left(\frac{\Delta}{A-U} \alpha\right)^2 + 2\beta\kappa\text{Var}^A(H) \frac{\Delta}{A-U} \alpha}{\text{Var}^U(R)} &= \frac{\frac{\Delta}{A-U} \alpha \left(\frac{\Delta}{A-U} \alpha + 2\beta\kappa\text{Var}^A(H)\right)}{\beta^2\text{Var}^U(H)} P_H \\
&> \frac{\left(\beta\kappa \frac{\Delta}{U-A} \text{Var}(H)\right) \left(\beta\kappa \frac{\Delta}{U-A} \text{Var}(H) + 2\beta\kappa\text{Var}^A(H)\right)}{\beta^2\text{Var}^U(H)} P_H \\
&= \frac{\beta^2\kappa^2 \frac{\Delta}{U-A} \text{Var}(H) (\text{Var}^U(H) + \text{Var}^A(H))}{\beta^2\text{Var}^U(H)} P_H \\
&> \kappa^2\text{Var}^U(H) \frac{\Delta \text{Var}(H)}{\text{Var}^U(H)} P_H
\end{aligned}$$

Hence,

$$\frac{\frac{\Delta}{U-A} \text{Var}(R)}{\text{Var}^U(R)} < (1 - \kappa^2\text{Var}^U(H)) \frac{\frac{\Delta}{U-A} \text{Var}(H)}{\text{Var}^U(H)} P_H - \frac{\frac{\Delta}{A-U} \text{cov}(R, X)}{\text{cov}^U(R, X)} (1 - P_H)$$

which gives the constraint on  $H$  as

$$\frac{\frac{\Delta}{U-A} \text{Var}(H)}{\text{Var}^U(H)} P_H > \frac{\frac{\Delta}{U-A} \text{Var}(R)}{\text{Var}^U(R)} \frac{1}{1 - \kappa^2\text{Var}^U(H)} + \frac{\frac{\Delta}{A-U} \text{cov}(R, X)}{\text{cov}^U(R, X)} \frac{1 - P_H}{1 - \kappa^2\text{Var}^U(H)}. \quad (6)$$

where  $0 < 1 - \kappa^2\text{Var}^U(H) = \frac{\text{Var}^U(X_0)}{\text{Var}(X)} < 1$ , since  $\text{Var}(X) = \text{Var}(X_0) + \kappa^2\text{Var}(H) = 1$ . Therefore, the lower bound on  $\frac{\frac{\Delta}{U-A} \text{Var}(H)}{\text{Var}^U(H)} P_H$  increases with the relative increase in  $\text{cov}(R, X)$ ,  $\frac{\frac{\Delta}{A-U} \text{cov}(R, X)}{\text{cov}^U(R, X)}$ , and the projection strength of  $H$  on  $X$ ,  $\kappa$ .

Fig. 1c (bottom) is plotted using Eq. (1) and Fig. 1e (bottom) is plotted using Eq. 6 with  $\frac{\frac{\Delta}{A-U} \text{cov}(R, X)}{\text{cov}^U(R, X)} = 1$  and  $\kappa^2\text{Var}(H)$  ranges from 0 to 0.5 for different curves.



## Supplementary Movie Captions

Movie S1: Spiking activities of a spatially ordered network with fast inhibition (Fig. 2a<sub>ii</sub>). Each black dot indicates that the neuron at spatial position (x; y) fired within one millisecond of the time stamp shown on top.

Movie S2: Same as Movie S1 for a spatially ordered network with slow inhibition (Fig. 2a<sub>iv</sub>).

Movie S3: Spiking activities of the MT excitatory population from the three layered spiking network model in the unattended state (Fig. 3a, 4b).

Movie S4: Same as Movie S3 for a network with broader inhibition in MT (Fig. 4d).

## References

1. Cohen, M. and Maunsell, J. Attention improves performance primarily by reducing interneuronal correlations. *Nature neuroscience* **12**(12), 1594–1600 (2009).
2. Ruff, D. A. and Cohen, M. R. Attention increases spike count correlations between visual cortical areas. *Journal of Neuroscience* **36**(28), 7523–7534 (2016).
